# Supplementary material for: Healing the Past by Nurturing the Future—co-designing perinatal strategies for Aboriginal and Torres Strait Islander parents experiencing complex trauma: framework and protocol for a community-based participatory action research study
Source: PubMed Central journal article supplement — BMJ Open. 2019 Jun 11;9(6):e028397. doi: 10.1136/bmjopen-2018-028397 (PMC6575864; doi:10.1136/bmjopen-2018-028397), 2019-06-11
Supplement: bmjopen-2018-028397supp003.pdf [file bmjopen-2018-028397supp003.pdf]

### Supplementary file 3: Perinatal strategies to support parents who have experienced maltreatment in their own childhoods: Evidence synthesis plan

|                                | Phase 1: Mapping                                                                                                    | Phase 2: In-depth reviews                                                                                                                                                                                                                                                               |                                                                                                                                                                                             |                                                                                                                                                                                                                                                                                                        |                                                                                                                                                                                                                                   | Phase 3: Overview                                                                                                        |
|--------------------------------|---------------------------------------------------------------------------------------------------------------------|-----------------------------------------------------------------------------------------------------------------------------------------------------------------------------------------------------------------------------------------------------------------------------------------|---------------------------------------------------------------------------------------------------------------------------------------------------------------------------------------------|--------------------------------------------------------------------------------------------------------------------------------------------------------------------------------------------------------------------------------------------------------------------------------------------------------|-----------------------------------------------------------------------------------------------------------------------------------------------------------------------------------------------------------------------------------|--------------------------------------------------------------------------------------------------------------------------|
| <b>Population</b>              | Parents planning pregnancy, during pregnancy or first two years postpartum                                          |                                                                                                                                                                                                                                                                                         |                                                                                                                                                                                             |                                                                                                                                                                                                                                                                                                        |                                                                                                                                                                                                                                   |                                                                                                                          |
| <b>Primary review question</b> | What evidence is available regarding child maltreatment/complex childhood trauma during the perinatal period?       | 1. What are the intergenerational pathways from parental maltreatment in the perinatal period? What factors mediate/moderate these outcomes? What theories help to explain these pathways (mechanisms)? And what aspects are supported or contradicted by the epidemiological evidence? | 2. What are perinatal experiences for parents who have experienced maltreatment in their own childhood? What strategies do parents use to heal and/or discontinue cycles of complex trauma? | 3. What is the effectiveness and cost of perinatal interventions for parents who have experienced maltreatment in their own childhood? Are there any differential effects of interventions in different subpopulations?                                                                                | 4. What is the sensitivity, specificity and utility of screening tools used in the perinatal period for identifying parents who have experienced maltreatment in their own childhood (exposure) and/or trauma symptoms (effects)? | What works? For whom? In what circumstances? Are the most effective interventions also acceptable? What are the costs?   |
| <b>Review type</b>             | Scoping review                                                                                                      | Systematic Review (epidemiological)                                                                                                                                                                                                                                                     | Systematic Review (qualitative)                                                                                                                                                             | Systematic review (quantitative)                                                                                                                                                                                                                                                                       | Diagnostic/test accuracy review                                                                                                                                                                                                   | Realist review                                                                                                           |
| <b>Search</b>                  | 'parent' AND 'childhood trauma' AND 'intergenerational' AND 'prevention'                                            | 'parent' AND 'childhood trauma' AND 'intergenerational' (based on revised terms from mapping phase)                                                                                                                                                                                     |                                                                                                                                                                                             |                                                                                                                                                                                                                                                                                                        |                                                                                                                                                                                                                                   | In-depth reviews, excluded reviews from previous search, integration with co-design workshops                            |
| <b>Study type</b>              | Any primary study related to (theories; mediators/moderators; parents' experiences; interventions; screening tools) | Theoretical and epidemiological studies (observational).                                                                                                                                                                                                                                | Qualitative studies.                                                                                                                                                                        | RCTs, CCTs, ITS (Descriptive studies).                                                                                                                                                                                                                                                                 | Screening test accuracy studies.                                                                                                                                                                                                  | Systematic reviews, co-design discussions                                                                                |
| <b>Data extraction</b>         | Microsoft Excel                                                                                                     | Eppi-reviewer or NVivo                                                                                                                                                                                                                                                                  |                                                                                                                                                                                             |                                                                                                                                                                                                                                                                                                        |                                                                                                                                                                                                                                   |                                                                                                                          |
| <b>Synthesis</b>               | Narrative synthesis                                                                                                 | Narrative synthesis using socioecological model and integration with co-design workshop/qual studies with Elders.                                                                                                                                                                       | Meta-synthesis of parents' experiences (1 <sup>st</sup> level) and author conclusions (2 <sup>nd</sup> level) to generate unique review themes across studies (3 <sup>rd</sup> level).      | Meta-analysis, meta-regression and narrative synthesis. Sensitivity analysis for major intervention components, study quality, implementation/process measures, and PROGRESS + characteristics (Age; Place; Race; education; social capital (partner/other); mental illness; SES; other risk factors). | HSROC analysis                                                                                                                                                                                                                    | Narrative synthesis                                                                                                      |
| <b>Outcomes</b>                | Evidence map                                                                                                        | Diagram/illustration of resilience, protective and risk factors that mediate or moderate relationship between childhood trauma and behavioural & health outcomes for parents and infants.                                                                                               | Review level synthesis with GRADE-CERQual assessment of confidence in evidence.                                                                                                             | Impact of interventions on process (acceptability/cost/implementation); parental behavioural and health outcomes; and infant behavioural and health outcomes.                                                                                                                                          | Sensitivity and specificity of existing screening tools.                                                                                                                                                                          | Recommendations for perinatal screening and support strategies are likely to support resilience and healing for parents. |
