# Supplementary material for: Healing the Past by Nurturing the Future—co-designing perinatal strategies for Aboriginal and Torres Strait Islander parents experiencing complex trauma: framework and protocol for a community-based participatory action research study
Source: PubMed Central journal article supplement — BMJ Open. 2019 Jun 11;9(6):e028397. doi: 10.1136/bmjopen-2018-028397 (PMC6575864; doi:10.1136/bmjopen-2018-028397), 2019-06-11
Supplement: bmjopen-2018-028397supp004.pdf [file bmjopen-2018-028397supp004.pdf]

## Supplementary file 4: Workshop 1 facilitators guide

| Time   |                                           | Facilitation Guide                                                                                                                                                                                                                                                                                                                                                                                                                                                                                                                                                                                                                                                                                                                                                                                                                                                                                                                                                                                                                  |
|--------|-------------------------------------------|-------------------------------------------------------------------------------------------------------------------------------------------------------------------------------------------------------------------------------------------------------------------------------------------------------------------------------------------------------------------------------------------------------------------------------------------------------------------------------------------------------------------------------------------------------------------------------------------------------------------------------------------------------------------------------------------------------------------------------------------------------------------------------------------------------------------------------------------------------------------------------------------------------------------------------------------------------------------------------------------------------------------------------------|
| 9.30am | Registration and tea/coffee/fruit platter | Greet participants/Elders/dancers etc                                                                                                                                                                                                                                                                                                                                                                                                                                                                                                                                                                                                                                                                                                                                                                                                                                                                                                                                                                                               |
|        |                                           |                                                                                                                                                                                                                                                                                                                                                                                                                                                                                                                                                                                                                                                                                                                                                                                                                                                                                                                                                                                                                                     |
| 10.00  | <b>START</b>                              | Welcome                                                                                                                                                                                                                                                                                                                                                                                                                                                                                                                                                                                                                                                                                                                                                                                                                                                                                                                                                                                                                             |
|        | Welcome/Acknowledgement to country        |                                                                                                                                                                                                                                                                                                                                                                                                                                                                                                                                                                                                                                                                                                                                                                                                                                                                                                                                                                                                                                     |
| 10.15  | Creating our safe space                   | <ul style="list-style-type: none"> <li>• Acknowledgement of what we are talking about is hard</li> <li>• Importance of listening</li> <li>• Ask group to contribute to collective agreement on 'principles of participation' and then put them up on butchers paper.</li> <li>• Reiterate no-one will be asked or expected to share personal experiences (not purpose of workshop)</li> <li>• Absolutely ok to leave at any time if uncomfortable &amp; to play on phone (nb smiling mind app)</li> <li>• Introduce trauma response factsheet (We Al-li Pty Ltd) and card with Psychologist contact.</li> <li>• Some diversionary activities on tables (mindfulness colouring/drawing).</li> <li>• Rocks on table for people to choose - one to paint as a symbol of 'hopes/dreams aspirations for project'. Write brief description on sticky notes. At end of day we will place these in the coolamon as a symbol of our aspirations, and also leaving the 'weight' of discussions here as we go back to our families.</li> </ul> |
| 10.30  | Introductions                             | <p>Ask people to form a big circle.</p> <ol style="list-style-type: none"> <li>1. Say your name and where you're from.</li> <li>2. Ask people to form groups of 3.</li> <li>3. Assistant hands each group of 3 x 6 strengths cards. Pick a strength/picture card (or choose each if you don't like it) And share a little story what that means to you or your family (from selection on table). Do this for a few minutes until about 10.55.</li> <li>4. Circle up and thank everyone for sharing (remind people to chat to those they didn't meet at lunchtime).</li> </ol>                                                                                                                                                                                                                                                                                                                                                                                                                                                       |
| 11.00  | Sharing research knowledge                | <ul style="list-style-type: none"> <li>• Clarify purpose of this session</li> <li>• Very simple overview of evidence, including from scoping review (remind sent out earlier),</li> <li>• Outline of project plan (team, approach, major activities and timelines)</li> <li>• Questions</li> <li>• Ask people to spend 10 min's in table to write down why are we here? what's brought you to this project?</li> </ul>                                                                                                                                                                                                                                                                                                                                                                                                                                                                                                                                                                                                              |

|       |                                         |                                                                                                                                                                                                                                                                                                                                                                                                                                                                                                                                                                                                                                            |
|-------|-----------------------------------------|--------------------------------------------------------------------------------------------------------------------------------------------------------------------------------------------------------------------------------------------------------------------------------------------------------------------------------------------------------------------------------------------------------------------------------------------------------------------------------------------------------------------------------------------------------------------------------------------------------------------------------------------|
|       |                                         | <ul style="list-style-type: none"> <li>– brightly coloured postit notes and large poster (words to go with images on rocks)</li> <li>• 5 mins feedback on group discussions</li> </ul>                                                                                                                                                                                                                                                                                                                                                                                                                                                     |
| 12.00 | LUNCH                                   | Stick words up on posters                                                                                                                                                                                                                                                                                                                                                                                                                                                                                                                                                                                                                  |
| 12.30 | Working together safely                 | <ul style="list-style-type: none"> <li>• Clarify purpose of this session</li> <li>• Brief discussion of importance of cultural/emotional safety – particularly in context of this project</li> <li>• Group experiential activity to understand lateral violence</li> <li>• Small group questions to generate protocol for cultural and emotional safety (1) for participants (families, community members, service providers); (2) among each other (3) with the broader society (e.g. ensuring anything coming out of project is not damaging to the broader community) and (4) between Indigenous and non-Indigenous peoples.</li> </ul> |
| 2.00  | AFTERNOON TEA                           |                                                                                                                                                                                                                                                                                                                                                                                                                                                                                                                                                                                                                                            |
| 2.15  | Sharing community and service knowledge | <ul style="list-style-type: none"> <li>• Clarify purpose of this session</li> <li>• Brief recap on evidence specific for Aboriginal communities</li> <li>• Group activity to understand:</li> <li>• How do you/services/communities currently recognise if a parent is experiencing trauma? (screening)</li> <li>• What assessment processes are currently used?</li> <li>• What support strategies are currently used?</li> </ul>                                                                                                                                                                                                         |
| 3.30  | Reflections and next steps              | <ul style="list-style-type: none"> <li>• Overview of day (5 mins)</li> <li>• Evaluation forms for feedback and suggestions for next workshop (10 mins)</li> <li>• Reminder to take care and be kind to themselves tonight (eat well, exercise etc important too)</li> <li>• Reflective activity with holding stone with aspirations and drop into coolamon (15 mins). People can share if they want with group. Sticky notes/record on butchers paper.</li> </ul>                                                                                                                                                                          |
| 4.00  | THANK YOU AND CLOSE                     | Thank you and close                                                                                                                                                                                                                                                                                                                                                                                                                                                                                                                                                                                                                        |
