# Supplementary material for: Healing the Past by Nurturing the Future—co-designing perinatal strategies for Aboriginal and Torres Strait Islander parents experiencing complex trauma: framework and protocol for a community-based participatory action research study
Source: PubMed Central journal article supplement — BMJ Open. 2019 Jun 11;9(6):e028397. doi: 10.1136/bmjopen-2018-028397 (PMC6575864; doi:10.1136/bmjopen-2018-028397), 2019-06-11
Supplement: bmjopen-2018-028397supp005.pdf [file bmjopen-2018-028397supp005.pdf]

**Supplementary file 5: Preliminary areas of distress synthesized from scoping of assessment tools**

|                                                                                                                                             |
|---------------------------------------------------------------------------------------------------------------------------------------------|
| <b>Discussion Part 2: Domains</b>                                                                                                           |
| <b>1 Intrusions</b> (DSMV/ICD/AAVHTQ) e.g. nightmares, flashbacks                                                                           |
| <b>2 Avoidance</b> (DSMV/ICD/AAVHTQ) e.g., avoiding people, places that are reminders, dissociation                                         |
| <b>3 Negative alterations in mood and cognitions</b> (DSMV) e.g., beliefs about self/others/world i.e., ‘always dangerous’                  |
| <b>4 Alterations in arousal and reactivity</b> (DSMV/ICD-AAVHTQ) e.g., heightened anxiety, irritability, aggression                         |
| <b>5 Emotion dysregulation</b> (ICD/AAVHTQ)<br>e.g., unable to regulate/manage heightened emotion (anger) or emotional numbness             |
| <b>6 Negative self-concept</b> (ICD/AAVHTQ)<br>e.g., guilt, shame, worthlessness, altered meaning/beliefs                                   |
| <b>7 Disturbed Relationships</b> (ICD/AAVHTQ)<br>e.g., difficulty developing/maintaining close relationships, feeling isolated/disconnected |
| <b>8 Community Disconnection</b> (AVHTQ)<br>e.g., feeling isolated/disconnected from one’s community/mob, may be due to conflict, D&A       |
| <b>9 Identity loss/fragmentation</b> (AVHTQ) e.g., impacted cultural identity due to interpersonal trauma                                   |
| <b>10 Grief and loss</b> (AVHTQ) e.g., unresolved or unintegrated grief and loss from interpersonal trauma                                  |
| <b>11 Other cultural idioms distress</b> (AVHTQ)<br>e.g., harm against self or others, D & A abuse, suicidality                             |
| <b>12 Depression</b>                                                                                                                        |
| <b>13 Psychosocial risks</b> (if so, which ones? Social determinants, parenting and family factors)                                         |
| <b>14 Strengths</b> (if so, which ones? personal, relational, cultural e.g., spirituality, connection to county, coping skills etc.)        |
| <b>15 Duration</b>                                                                                                                          |
| <b>16 Functional impact</b>                                                                                                                 |
| <b>17 Attribution (not due to medical or other)</b>                                                                                         |
| <b>18 Exposure</b> (if so, what language/events?)                                                                                           |
